# Supplementary material
Source: PubMed Central journal article supplement (PMC6613567)
Supplement: NIHMS1027947-supplement-1.pdf [file NIHMS1027947-supplement-1.pdf]

## SLEEP VARIABILITY AND ACUTE SUICIDE RISK

**Table 1.** Additional Baseline Sample and Clinical Severity Characteristics

|                                                  | No. (%) or Mean (SD) |
|--------------------------------------------------|----------------------|
| <b>Suicidal Behavior History</b>                 |                      |
| <i>2 Suicide Attempts, No. (%)</i>               | 9 (18)               |
| <i>≥ 3 Suicide Attempts, No. (%)</i>             | 6 (12)               |
| <b>Non-Suicidal Self-Injury History, No. (%)</b> |                      |
| <i>Years Since Last NSSI, mean (SD)</i>          | 2.7 (2.0)            |
| <i>≥20 Times Engaged in NSSI, mean (SD)</i>      | 5 (10)               |
| <b>Psychiatric Diagnoses, No. (%)</b>            |                      |
| <i>Major Depressive Disorder, No. (%)</i>        | 12 (57)              |
| <i>Schizoaffective Disorder, No. (%)</i>         | 1 (5)                |
| <i>Bipolar Disorder, No. (%)</i>                 | 3 (14)               |
| <i>Generalized Anxiety Disorder, No. (%)</i>     | 5 (24)               |
| <i>Social Anxiety Disorder, No. (%)</i>          | 1 (14)               |
| <i>Obsessive-Compulsive Disorder, No. (%)</i>    | 1 (14)               |
| <i>Bulimia Nervosa, No. (%)</i>                  | 1 (5)                |
| <i>Insomnia, No. (%)</i>                         | 2 (10)               |

**Abbreviations:** NSSI, non-suicidal self-injury

SLEEP VARIABILITY AND ACUTE SUICIDE RISK

**Table 2.** Variability of Actigraphic Sleep Parameters as Predictors of Suicidal Ideation Changes at 7-Days Follow-Up

|                             | <i>t</i> | $\beta$ (95% CI)       | <i>P Value</i> | Model Statistics                                                      |  |
|-----------------------------|----------|------------------------|----------------|-----------------------------------------------------------------------|--|
| <b>Regression 1: T2 BSS</b> |          |                        |                |                                                                       |  |
| <i>Block 1:</i>             |          |                        |                |                                                                       |  |
| <i>TI BSS</i>               | 7.53     | 0.76 (0.46 to 0.80)    | <0.01          | <i>R</i> <sup>2</sup> = .75<br><i>F</i> (7,41)=17.53<br><i>P</i> <.01 |  |
| <i>BDI-II</i>               | 0.12     | 0.01 (-0.10 to 0.12)   | 0.91           |                                                                       |  |
| <i>Block 2:</i>             |          |                        |                |                                                                       |  |
| <i>SE, SD</i>               | 0.27     | 0.03 (-0.15 to 0.19)   | 0.79           |                                                                       |  |
| <i>WASO, SD</i>             | -0.73    | -0.06 (-0.12 to 0.06)  | 0.47           |                                                                       |  |
| <i>SoL, SD</i>              | 0.92     | 0.08 (-0.06 to 0.15)   | 0.36           |                                                                       |  |
| <i>TST, SD</i>              | -2.38    | -0.25 (-3.35 to -0.28) | 0.02           |                                                                       |  |
| <i>SV, SD</i>               | 3.89     | 0.34 (0.20 to 0.64)    | <0.01          |                                                                       |  |
| <b>Regression 2: T3 BSS</b> |          |                        |                |                                                                       |  |
| <i>Block 1:</i>             |          |                        |                |                                                                       |  |
| <i>TI BSS</i>               | 4.98     | 0.62 (0.33 to 0.78)    | <0.01          | <i>R</i> <sup>2</sup> = .55<br><i>F</i> (7,41)=9.41<br><i>P</i> <.01  |  |
| <i>BDI-II</i>               | 0.92     | 0.12 (-0.08 to 0.22)   | 0.36           |                                                                       |  |
| <i>Block 2:</i>             |          |                        |                |                                                                       |  |
| <i>SE, SD</i>               | -0.81    | -0.10 (-0.32 to 0.14)  | 0.42           |                                                                       |  |
| <i>WASO, SD</i>             | -0.55    | -0.06 (-0.15 to 0.09)  | 0.58           |                                                                       |  |
| <i>SoL, SD</i>              | 0.49     | 0.05 (-0.11 to 0.17)   | 0.63           |                                                                       |  |
| <i>TST, SD</i>              | -1.79    | -0.23 (-3.89 to 0.23)  | 0.08           |                                                                       |  |
| <i>SV, SD</i>               | 2.82     | 0.31 (0.13 to 0.71)    | 0.01           |                                                                       |  |

**Note.** BDI-II, Beck Depression Inventory; BSS, Beck Scale for Suicide Ideation; SE, Sleep Efficiency; WASO, Wake After Sleep Onset; SoL, Sleep Onset Latency; TST, Total Sleep Time; SV, Sleep Variability; SD = Standard Deviation
